1 **Visualization of subcortical structures in non-human primates in vivo by Quantitative**  
2 **Susceptibility Mapping at 3T MRI**

3

4 **Abbreviated title:**

5 Macaque subcortical visualization by QSM at 3T MRI

6

7 **Authors and Affiliations:**

8 Atsushi Yoshida<sup>1</sup>, Frank Q Ye<sup>2</sup>, David K Yu<sup>2</sup>, David A Leopold<sup>2,3</sup>, Okihide Hikosaka<sup>1</sup>

9 <sup>1</sup> Laboratory of Sensorimotor Research, National Eye Institute, National Institutes of Health,  
10 Bethesda, MD 20892.

11 <sup>2</sup> Neurophysiology Imaging Facility, National Institute of Mental Health, National Institute for  
12 Neurological Disorders and Stroke, National Eye Institute, National Institutes of Health,  
13 Bethesda, MD 20892.

14 <sup>3</sup> Laboratory of Neuropsychology, National Institute of Mental Health, National Institutes of  
15 Health, Bethesda, MD 20892.

16

17 **Keywords:** Non-human primate, Macaque monkey, MRI, QSM, Magnetic susceptibility

18

19 **Correspondence to:**

20 Atsushi Yoshida, MD, PhD

21 Laboratory of Sensorimotor Research, National Eye Institute, National Institutes of Health,  
22 Bethesda, MD 20892.

23 Email: yoshidaatsushi0113@gmail.com

24 **Author contribution:** A.Y., F.Y., D.Y., D.L., and O.H. designed research; A.Y., F.Y., and D.Y.  
25 performed research; A.Y. analyzed data; A.Y. wrote the paper; and A.Y., F.Y., D.Y., D.L., and  
26 O.H. edited the paper.

27

28 **Conflict of interest:** All authors claim that there are no conflicts of interest.

29

30 **Acknowledgments:** This research was supported by the Intramural Research Program at the  
31 National Institutes of Health, National Eye Institute, and JSPS KAKENHI Grant (Grant-in-Aid  
32 for Fostering Joint International Research (A), 17KK0180). MRI scanning was carried out in the  
33 Neurophysiology Imaging Facility Core (National Institute of Mental Health, National Institute  
34 of Neurological Disorders and Stroke, and National Eye Institute). We thank D. Parker, A.  
35 Lopez, D. O'Brien, V.L. McLean, I. Bunea, G. Tansey, M.K. Smith, A.M. Nichols, D.  
36 Yochelson, J.W. McClurkin, A.V. Hays, and J. Fuller-Deets for technical assistance.

37

38

39

40

41

42

43

44

45

46

47 **Highlights**

- 48 • NHP subcortical structures are challenging to see in conventional T1w and T2w images
- 49 • We applied quantitative susceptibility mapping (QSM) to identify them easily
- 50 • QSM clearly visualized basal ganglia and cerebellar nucleus of high brain iron content
- 51 • CNRs of some subcortical nucleus were significantly higher in QSM
- 52 • QSM values of several subcortical nucleus increased with age

53

54 **Abbreviation**

|    |        |                                            |
|----|--------|--------------------------------------------|
| 55 | AC     | anterior commissure                        |
| 56 | CNR    | contrast-to-noise ratio                    |
| 57 | CdB    | body of caudate nucleus                    |
| 58 | CdH    | head of caudate nucleus                    |
| 59 | CdT    | tail of caudate nucleus                    |
| 60 | DBS    | deep brain stimulation                     |
| 61 | DN     | dentate nucleus                            |
| 62 | GPe    | globus pallidus external segment           |
| 63 | GPi    | globus pallidus internal segment           |
| 64 | IC     | internal capsule                           |
| 65 | GRE    | gradient echo                              |
| 66 | MCP    | middle cerebellar peduncle                 |
| 67 | MPRAGE | magnetization prepared rapid gradient echo |
| 68 | MRI    | magnetic resonance imaging                 |
| 69 | NHP    | non-human primate                          |

|    |           |                                                                                     |
|----|-----------|-------------------------------------------------------------------------------------|
| 70 | NMT       | NIMH macaque template                                                               |
| 71 | OT        | optic tract                                                                         |
| 72 | Put       | putamen                                                                             |
| 73 | QSM       | quantitative susceptibility mapping                                                 |
| 74 | ROI       | region of interest                                                                  |
| 75 | SARM      | subcortical atlas of the rhesus macaque                                             |
| 76 | SN        | substantia nigra                                                                    |
| 77 | SPACE     | sampling perfection with application optimized contrasts using different flip angle |
| 78 | evolution |                                                                                     |
| 79 | STN       | subthalamic nucleus                                                                 |
| 80 | T1w       | T1-weighted                                                                         |
| 81 | T2w       | T2-weighted                                                                         |
| 82 | TE        | echo time                                                                           |
| 83 | TR        | repetition time                                                                     |
| 84 | 3D        | three-dimensional                                                                   |
| 85 | VP        | ventral pallidum                                                                    |
| 86 |           |                                                                                     |
| 87 |           |                                                                                     |
| 88 |           |                                                                                     |
| 89 |           |                                                                                     |
| 90 |           |                                                                                     |
| 91 |           |                                                                                     |
| 92 |           |                                                                                     |

93 **Abstract**

94 Magnetic resonance imaging (MRI) is now an essential tool in the field of neuroscience  
95 involving non-human primates (NHP). Structural MRI scanning using T1-weighted (T1w) or T2-  
96 weighted (T2w) images provides anatomical information, particularly for experiments involving  
97 deep structures such as the basal ganglia and cerebellum. However, for certain subcortical  
98 structures, T1w and T2w images fail to reveal important anatomical details. To better visualize  
99 such structures in the macaque brain, we applied a relatively new method called quantitative  
100 susceptibility mapping (QSM), which enhances tissue contrast based on the local tissue magnetic  
101 susceptibility. To evaluate the visualization of important structures, we quantified the the  
102 contrast-to-noise ratios (CNRs) of the ventral pallidum (VP), globus pallidus external and  
103 internal segments (GPe and GPi), substantia nigra (SN), subthalamic nucleus (STN) in the basal  
104 ganglia and the dentate nucleus (DN) in the cerebellum. For these structures, the QSM method  
105 significantly increased the CNR, and thus the visibility, beyond that in either the T1w or T2w  
106 images. In addition, QSM values of some structures were correlated to the age of the macaque  
107 subjects. These results indicate that the QSM method can enable the clear identification of  
108 certain subcortical structures that are invisible in more traditional scanning sequences.

109

110

111

112

113

114

115

116 ***1. Introduction***

117 Magnetic resonance imaging (MRI) plays an essential role in neuroscience research involving  
118 non-human primates (NHP). For example, structural MRI scanning to obtain T1-weighted (T1w)  
119 or T2-weighted (T2w) images provides important details of brain structure that guides the  
120 penetration of microelectrodes for recording neural activity or cannulae for injecting any of a  
121 range of agents into the brain, including recent virally expressed proteins for optogenetic and  
122 chemogenetic perturbation of brain circuits (Amita et al., 2020; Bonaventura et al., 2019; El-  
123 Shamayleh & Horwitz, 2019; Eldridge et al., 2016; Maeda et al., 2020; Nagai et al., 2016;). Prior  
124 to the advent of MRI, NHP neurophysiologists relied on postmortem histological evaluation of  
125 brain sections under the microscope to determine definitively the area in which they had targeted  
126 with their recordings or injections. The capacity to check recording location using MRI has thus  
127 greatly increased the accuracy and efficiency of electrophysiology experiments in non-human  
128 primates.

129         Increasingly, modern viral methods utilize anatomical MRI data to identify targets for  
130 stereotaxic injection (Fredericks et al., 2020). While some targets are readily visible using  
131 standard MRI contrast, others are not. For example, it has been virtually impossible to use T1w  
132 or T2w contrasts to detect boundaries within subcortical nuclei of the basal ganglia (e.g., the  
133 globus pallidus, the substantia nigra) and the cerebellum (e.g., the dentate nucleus). This is  
134 because the signal intensities of these gray matter structures are, in fact, similar to those of the  
135 white matter around them. As a result, many functionally distinct substructures whose  
136 differential targeting may be of potential interest remain undifferentiated even in high quality  
137 MRI atlases of the macaque brain (Seidlitz et al., 2018).

138 Quantitative susceptibility mapping (QSM) is a relatively new MRI acquisition approach for  
139 enhancing tissue contrast (Liu et al., 2011; Wu et al., 2012; Li et al., 2011). This method exploits  
140 subtle differences in local tissue magnetic susceptibility, allowing for the visibility of otherwise  
141 hidden gray matter substructures, particularly those rich in iron. Quantitative susceptibility  
142 values across the brain are reconstructed from the MRI phase images acquired using a 3D  
143 gradient echo (GRE) sequence. Previous human studies have shown that the QSM method offers  
144 substantial visualization of internal tissue contrast for structures such as the basal ganglia, whose  
145 components vary in their level of iron deposition. For example, within the basal ganglia, this  
146 method allows for the visualization and segmentation of gray matter structures with similar T1w  
147 and T2w contrasts, such as the globus pallidus external segment (GPe), globus pallidus internal  
148 segment (GPi), subthalamic nucleus (STN), substantia nigra (SN) (Liu et al., 2013b). As a result,  
149 the QSM method has been clinically used to guide neurosurgical implantation of electrodes in  
150 the STN, a primary target in deep brain stimulation (DBS) for Parkinson's patients (de Hollander  
151 et al., 2014; Dimov et al., 2018). While the QSM should be similarly useful to neuroscientists  
152 focusing on these and other subcortical structures in monkeys, to our knowledge this method has  
153 not been previously used in NHPs at 3T.

154 The present study applies the QSM acquisition protocol to the macaque brain *in vivo* to  
155 examine its feasibility and robustness in this species. The results demonstrate clear contrast  
156 images of deep gray matter structure, including the visualization of subnuclei of the basal ganglia  
157 and the cerebellum that is unclear in T1w and T2w images.

158

## 159 ***2. Materials and methods***

### 160 **Subjects**

161 Six adult male rhesus monkeys (*Macaca mulatta*), three younger monkeys (M1 (8 years and three  
162 months old, 10kg), M2 (8 years and five months old, 13kg), and M3 (8 years and five months  
163 old, 11kg)), and three older monkeys (M4 (13 years and four months old, 12kg), M5 (14 years  
164 and six months old, 14kg), and M6 (14 years and seven months old, 14kg)), participated in this  
165 study. Head post implant were present in three of the six subjects to immobilize the head. All  
166 experimental procedures followed National Institutes of Health guidelines and were approved by  
167 the Animal Care and Use Committee of the National Eye Institute.

168

### 169 **Animal preparation for MRI**

170 All MR images were acquired under anesthesia to avoid image artefact by head motion.  
171 Monkey's head was fixed in an MRI-compatible stereotaxic frame. For anesthesia, atropine (0.05  
172 mg/kg, i.m.) was initially injected and ketamine (10 mg/kg, i.m.) and dexmedetomidine (0.01  
173 mg/kg, i.m.) were used for induction. Additional ketamine (5 mg/kg, i.m.) and dexmedetomidine  
174 (0.01 mg/kg, i.m.) were injected for maintenance.

175

### 176 **Imaging Protocols and QSM reconstruction**

177 MR imaging of all six monkeys was performed in a clinical 3T MR imaging system  
178 (MAGNETOM Prisma; Siemens Healthcare, Erlangen, Germany) using a human 15-channel  
179 human knee coil. T1w images were acquired using MPRAGE whose parameters were as follows:  
180 0.5 mm isotropic, FOV 128 x 128 x 112 mm, matrix 256 x 256 slices per slab 224, sagittal  
181 orientation, number of averages 4, TR 2200 ms, TE 2.23 ms, TI 900 ms, flip angle 8. T2w  
182 images were acquired using SPACE (Mugler et al., 2000) with the following parameters: 0.5 mm  
183 isotropic, FOV 128 x 128 x 112 mm, matrix 256 x 256, slice per slab 224, TR 3200 ms, TE 562



184 ms, number of averages 2. QSM was obtained with a 3D multi-echo gradient-echo (GRE)  
185 sequence with TR 50 ms, TE: 3.65/10.11/16.73/23.35/29.97/36.59/43.21 ms, bandwidth 280  
186 Hz/pixel, flip angle 15, FOV 128 x 128 x 57.6 mm, matrix 320 x 320 x 144, number of averages  
187 1.

188 QSM images were reconstructed from the phase images from 3D GRE with multiple  
189 echo, as described previously in detail (Liu et al., 2015; Wang et al., 2015) and summarized in  
190 Fig. 1A. This reconstruction process consisted of three main steps: (1) *Unwrapping of the phase*  
191 *images*. This step was necessary because any angle of proton phase shift lying outside the range  
192 between  $-\pi$  and  $\pi$  is folded back in the image, and this folding was abundant in raw phase  
193 images with longer TE. (2) *High-pass filtering of phase image*. This step compensated for the  
194 dominating susceptibility influence of the tissue-air interface ('background phase') and focused  
195 instead on local tissue phase images. (3) *Dipole deconvolution*. This step was performed to map  
196 the magnetic susceptibility in each voxel. Many algorithms to solve this dipole inversion  
197 problem have been developed (Li et al., 2011; Liu et al., 2009; Liu et al., 2012; Tang et al., 2013;  
198 Wharton et al., 2010). In this study, we used the Morphology Enabled Dipole Inversion (MEDI)  
199 method (Bollmann et al., 2019; Liu et al., 2011; Liu et al., 2012; Liu et al., 2013a; Liu et al.,  
200 2018). These three steps were performed by using the MEDI toolbox on MATLAB2019 (Liu et  
201 al., 2012, <http://pre.weill.cornell.edu/mri/pages/qsm.html>).

202

### 203 **Quantitative image evaluation**

204 To evaluate the visibility of the ventral pallidum (VP), globus pallidus external segment (GPe),  
205 globus pallidus internal segment (GPi), substantia nigra (SN), subthalamic nucleus (STN) in the  
206 basal ganglia, and the dentate nucleus (DN) in the cerebellum in T1w, T2w, and QSM, the

207 contrast-to-noise ratios (CNRs) were calculated by the following formula:  $CNR = |I_{ROI} -$   
208  $I_{wm}|/\sigma_{wm}$ , where  $I_{ROI}$  is the average signal intensity of the region of interest (ROI) and  $I_{wm}$  is the  
209 average signal intensity of white matter near ROI (Dimov et al., 2018).  $\sigma_{wm}$  represents the noise  
210 measurement calculated as the standard deviation of  $I_{wm}$ . First of all, to create ROIs semi-  
211 automatically, each subject's T1w image was aligned to the standard NIMH macaque template  
212 (NMT v2.0) using analysis pipeline (*NMT\_subject\_align*) with software AFNI (Cox 1996; Jung  
213 et al., 2021; Seidlitz et al., 2018) (Fig. 1B (a), (b)). Secondly, the subcortical atlas of the rhesus  
214 macaque (SARM) for NMT (Hartig et al., 2021) was inversely transformed to the subject T1w  
215 image (Fig. 1B (c), (d)) by AFNI's *3dNwarpApply* with output files from *NMT\_subject\_align*  
216 pipeline (inverse of linear transformation matrix and non-linear warp field). Finally, if the  
217 modification of ROIs was needed, we edited it manually, referring to the QSM, T1w, and T2w  
218 images. Afterward, these masks were applied to the T2w and QSM images for calculating the  
219 CNRs after resampled the voxel size of the QSM from 0.4 mm to 0.5 mm as well as the T1w and  
220 T2w. We used the left hemisphere for determining ROIs. For measuring the CNR of ROIs, we  
221 defined as  $I_{wm}$  the ipsilateral anterior commissure (AC) (for the VP in Fig. 2), the internal  
222 capsule (IC) (for the GPe and GPi in Fig. 3), the optic tract (for the SN and STN in Fig. 4), the  
223 part of the ipsilateral middle cerebellar peduncle (for the DN in Fig. 5).

224

## 225 **Statistical analysis**

226 Kruskal-Wallis tests were performed to compare the differences in the CNRs among T1w, T2w,  
227 and QSM and in the subcortical structures (VP, GPe, GPi, SN, STN, and DN) followed by the  
228 post hoc multiple comparisons (Dunn-Sidak test) were executed. To investigate whether the  
229 QSM values in each subcortical structure were correlated with monkeys' age, we also assessed

230 Spearman's rank correlation test between monkeys' age and the mean QSM values in each ROIs.  
231 For multiple comparisons, we applied the Benjamini-Hochberg procedure controlling at a  
232 significance level of  $\alpha = 0.05$  (Benjamini et al, 1995). These statistical analyses were performed  
233 using MATLAB Statistics and Machine Learning Toolbox.

234

### 235 **3. Results**

#### 236 **Visualization of subcortical structures**

237 Figs. 2, 3, 4, and 5 show comparisons of subcortical structures among T1w, T2w, and QSM for  
238 several subcortical regions of the brain marked by low contrast in conventional anatomical MRI  
239 scans. The upper panel in each figure shows MR images from one of the younger monkeys  
240 (monkey M1, 8 y/o), while the lower panel illustrates images from one of the older monkeys  
241 (monkey M6, 14 y/o). In each case, QSM highlighted certain substructures as having higher  
242 susceptibility, reflecting a higher level of iron content than neighboring areas. For example,  
243 QSM applied to the pallidal structure (Fig. 2C) shows distinct boundaries among the VP, GPe,  
244 and AC, in contrast to the conventional images where the boundaries were indistinct because the  
245 structures have similar T1w and T2w values. Fig. 3 illustrates the value of QSM in identifying  
246 the boundary of another portion of the globus pallidus, namely the medial medullary lamina  
247 between the GPe and GPi (indicated by yellow-colored arrowhead in Fig.3C and F), also subtle  
248 or absent in T1w and T2w scans. In Figure 4, the QSM further highlights the substantial nigra  
249 (SN) of the midbrain, and the nearby GPe components of the globus pallidus. Although the SN  
250 was detectable in QSM from both younger and older monkeys, the subthalamic nucleus (STN)  
251 was subtle even in QSM from the older monkey (Fig.4F). QSM also illustrated the position and  
252 detailed shape of the dentate nucleus in the cerebellum (Fig. 5), which was nearly invisible in

253 T1w and T2w images. This marked difference probably stems from the elevated iron deposition  
254 in the dentate nucleus compared to other cerebellar nuclei, such as the nucleus interpositus and  
255 nucleus medialis, whose hyperintensity is observed to be less.

## 256 **Quantitative Results**

257 To quantitatively evaluate visualization of subcortical structures in QSM, T1w, and T2w, we  
258 measured the CNRs of them in each MR image and performed statistical tests. Figure 6 presents  
259 the results of comparing the CNRs. The Kruskal-Wallis test and post hoc test revealed that the  
260 CNRs of all 6 subcortical structures in QSM were significantly higher than those in T1w and/or  
261 T2w ( $P < 0.05$ , Dunn-Sidak). We also assessed the regression analysis (Pearson's rank  
262 correlation test) to investigate whether the mean QSM value of each ROI correlated with  
263 subjects' ages (Fig. 7). The QSM values of the VP, GPe, GPi were significantly correlated with  
264 ages corrected by Benjamini-Hochberg procedure.

265

## 266 **4. Discussion**

267 Our results indicate that quantitative susceptibility mapping in the macaque offers a marked  
268 improvement in the visualization of certain subcortical structures, significantly heightening the  
269 CNRs over T1w and/or T2w images. Most notably, QSM enabled a clear and efficient  
270 differentiation of the pallidum (VP, GPe, and GPi), substantia nigra, and cerebellar nucleus (DN)  
271 from the white matter around them. Thus, this anatomical scanning approach may be  
272 advantageous for neuroscientists targeting these and nearby structures for the recording of  
273 neuronal activity or the injection of viral vectors or other agents. To our knowledge, this is the  
274 first study for the feasibility of QSM in the macaque brain in vivo at 3T MRI, with only one  
275 previous article applying QSM to the macaque brain at 9.4T (Wen et al., 2019).

276 QSM is based on the local measurement of magnetic susceptibility tissue, which strongly  
277 reflects the concentration of paramagnetic unpaired electrons. This sensitivity makes QSM able  
278 to identify and delineate the boundaries of the structures prone to iron deposition as ferritin, such  
279 as the nuclei in the basal ganglia (the VP, GPe, GPi, and SN) and the cerebellum (DN)  
280 (Schweser et al., 2011; Schafer et al., 2012). Iron deposition in these structures occurs from a  
281 young age in humans (Bilgic et al., 2012; Keuken et al., 2017; Li et al., 2014; Persson et al.,  
282 2015) and probably also in macaque monkeys. Actually, the CNRs of QSM, even in younger  
283 monkeys around 8 years old, were higher, and the QSM values in subcortical structures were  
284 positively correlated with ages.

285 The improved CNRs of the subcortical structures compared to T1w and T2w, QSM  
286 allows macaque researchers to investigate the substructure of deep subcortical regions in a way  
287 that has not previously been possible using anatomical MRI methods. This method may be  
288 particularly useful for neuroscientists in NHP who investigate the functions of the basal ganglia  
289 and the cerebellum. Clear visualization of the structures in QSM can increase the efficiency of  
290 researchers by decreasing the number of electrode or needle penetrations required for neuronal  
291 recording the injection of chemical substances such as pharmacological agents or viral vectors  
292 for genetical manipulations. Several human neurosurgery researchers have recently reported that  
293 QSM is useful for surgeries to put electrodes for deep brain stimulation (DBS) for Parkinson's  
294 disease or dystonia patients. Similar to the work shown here, these studies showed that QSM at  
295 3T MRI (Dimov et al., 2018; Li et al., 2020; Wei et al., 2019) and 7T MRI (de Hollander et al.,  
296 2014) visualized targets of the DBS (the STN, GPi, and centromedian thalamic nucleus). For  
297 macaque research, this method, combined with T1w images for the grid in the neuronal  
298 recording chamber, will allow us to achieve more precise targeting in focusing on the subcortical

299 regions. The adoption of QSM may also help avoid the need to euthanize monkeys merely to  
300 check the position of electrodes or injections in histological sections.

301         One possible application of this method is the incorporation of QSM contrast into new  
302 macaque MRI brain atlases, such as the National Institute of Mental Health Macaque Template  
303 (NMT), which is a high-quality contrast made from T1w images of 31 macaque monkeys (Jung  
304 B et al., 2021; Seidlitz et al., 2018). Whereas the NMT shows clear structures in the basal  
305 ganglia, the T1w images, particularly in younger monkeys, do not provide sufficient contrast to  
306 segment the substantia nigra (SN). This is why one can't get precise alignment between the  
307 standard template and the native structure image. In fact, the results of aligning the SN region in  
308 the SARM atlas to the native subject's T1w images were not accurate (all SN ROIs were out of  
309 alignment in the superior direction (Fig. S1)), and thus we needed to manually modify ROIs for  
310 the SN of all subjects. To use QSM image for registration to NMT and SARM will provide  
311 precisely the SN discrimination, and it help us to enable the more accurate analysis, in which, for  
312 example, it is allowed for analysis of functional MRI (fMRI) data (task fMRI or resting-state  
313 fMRI) to use more accurate seed or ROI. QSM in this study also clearly illustrated the DN in the  
314 cerebellum. The DN receives projections mainly from Crus I and Crus II in the cerebellar  
315 hemisphere, which are assumed to be involved in the cognitive functions (Bostan et al, 2018; Ito  
316 2008; Middleton et al., 2001; Strick et al., 2009). Many researchers in NHP have been interested  
317 in investigating the cognitive functions of the DN (Ashmore et al., 2013; Kunimatsu et al., 2018;  
318 Lu et al., 1998; Ohmae et al., 2013). Thus, QSM may be useful not only for neuronal recording  
319 from the DN but also for more precision seed analysis of the DN in the fMRI research in NHP.

320         Finally, there are a few limitations of this method that should be stated explicitly. First,  
321 QSM is highly sensitive to tissue with substances that induce susceptibility change. After

322 penetration of electrode or needle, hemosiderin deposit will happen naturally in the affected  
323 brain tissue. Because hemosiderin includes iron, QSM illustrates hemosiderin deposit as  
324 hyperintensity. Thus, it may not be easy to see the accurate borders of the subcortical structures  
325 in QSM after several electrode or needle penetrations. Therefore, it may be better to carry out  
326 QSM scanning before any penetrations or early in the experiment. Second, iron deposition in the  
327 subcortical structures starts during adolescence in humans. Thus, the QSM method does not  
328 show hyperintensity in these structures in childhood and may therefore not be useful to guide  
329 experiments in infant monkeys (Bilgic et al., 2012; Li et al., 2014; Persson et al., 2015).  
330 In summary, our results suggest that QSM visualized the subcortical structures more clearly than  
331 the conventional T1w and T2w. It may be useful for a range of neuroscience applications in NHP  
332 that benefit from the clear visualization of structural divisions among subcortical regions.

333

#### 334 ***Data Availability***

335 MR images data related to this publication will be available upon reasonable request from the  
336 corresponding author (A.Y.).

337

338

339

340

341

342

343

344

345 **Figures**

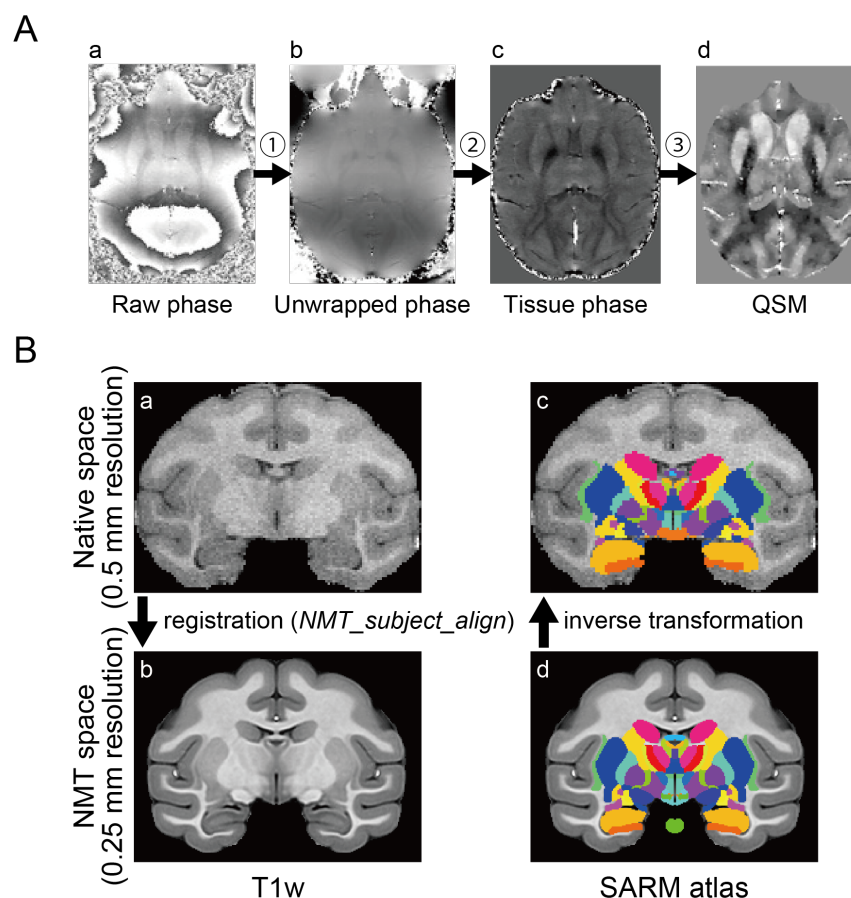

346  
347 **Figure 1.** Imaging preprocesses. (A) Overview of QSM processing. QSM is reconstructed from  
348 3D gradient echo phase images with different TE. There are three main steps in the processing  
349 from the raw phase image to QSM; ① unwrapping ② background phase removal by high-pass  
350 filtering, ③ inverse problem solution by performing a dipole deconvolution. (B) Automatic ROI  
351 creation using SARM atlas. SARM atlas in NMT space was inversely transformed into each  
352 subject's space (from (d) to (c)) using output from alignment of a subject's T1w image to NMT  
353 (from (a) to (b)).

354  
355  
356



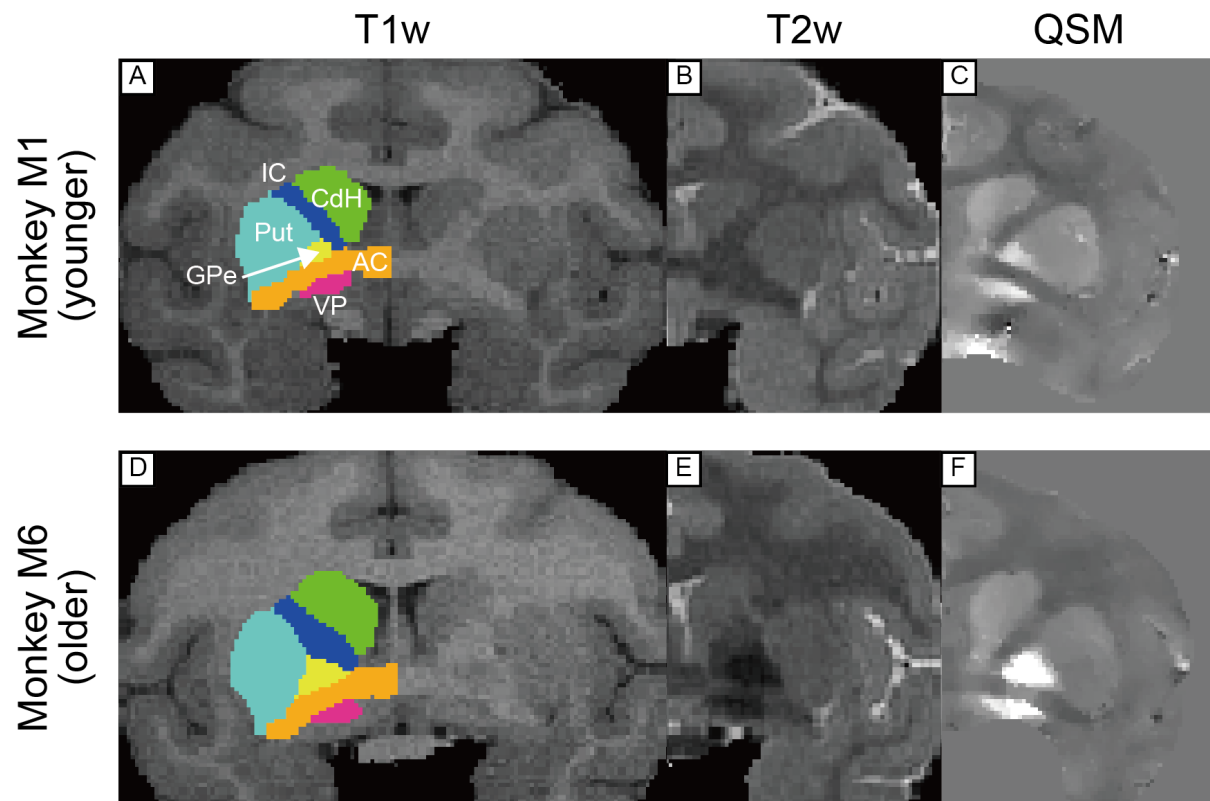

357

358 **Figure 2.** T1w, T2w, and QSM coronal images including anterior commissure (AC) in a younger

359 ((A), (B), and (C)) and older monkeys ((D), (E), and (F)). Colored drawings in left hemisphere in

360 T1w images indicate ROIs created from SARM atlas. These were used for calculations of CNR

361 and mean QSM values. Abbreviations: AC, anterior commissure. CdH, head of caudate nucleus.

362 GPe, globus pallidus external segment. IC, internal capsule. Put, putamen. VP, ventral pallidum.

363

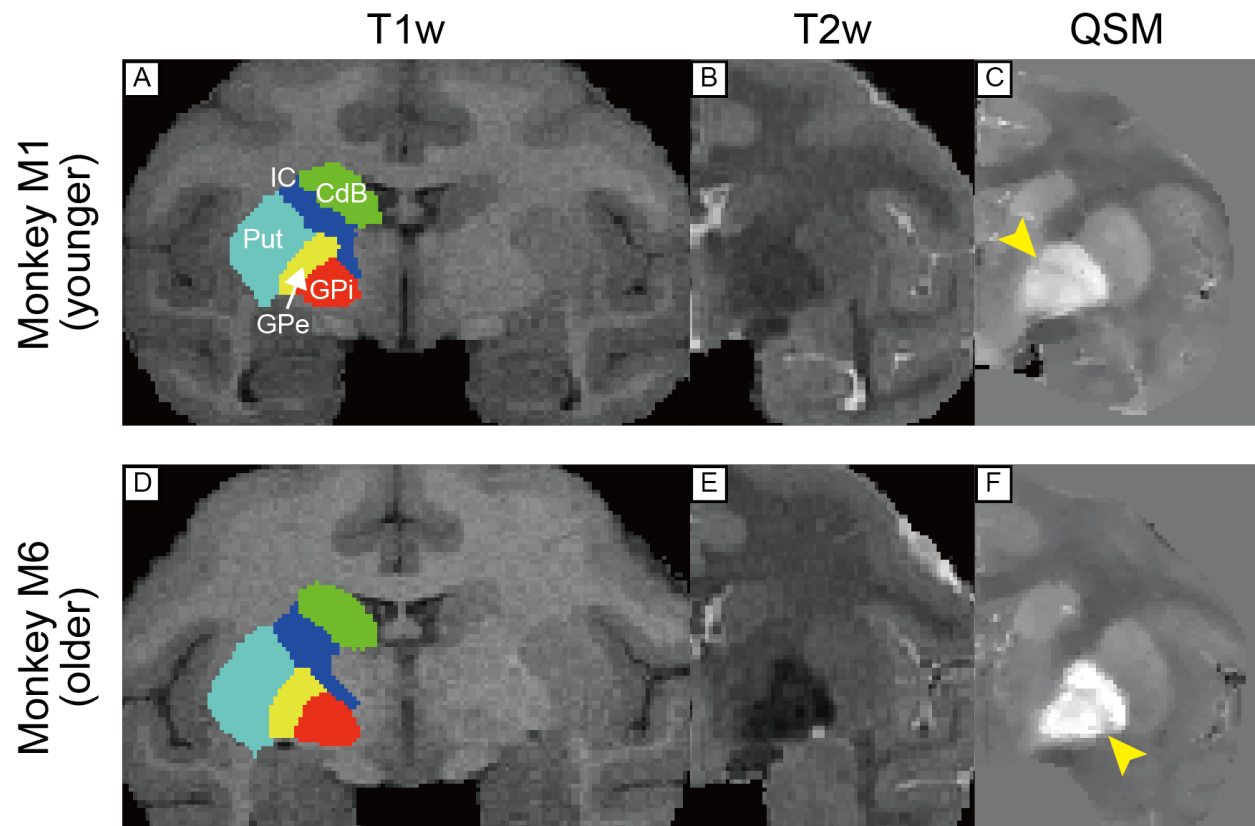

364

365 **Figure 3.** T1w, T2w, and QSM coronal images including borders of GPe and GPi in a younger

366 ((A), (B), and (C)) and older monkeys ((D), (E), and (F)). Yellow arrow head in (C) and (F)

367 indicates the medial medullary lamina. Abbreviations: CdB, body of caudate nucleus. GPe,

368 globus pallidus external segment. GPi, globus pallidus internal segment. IC, internal capsule.

369 Put, putamen.

370

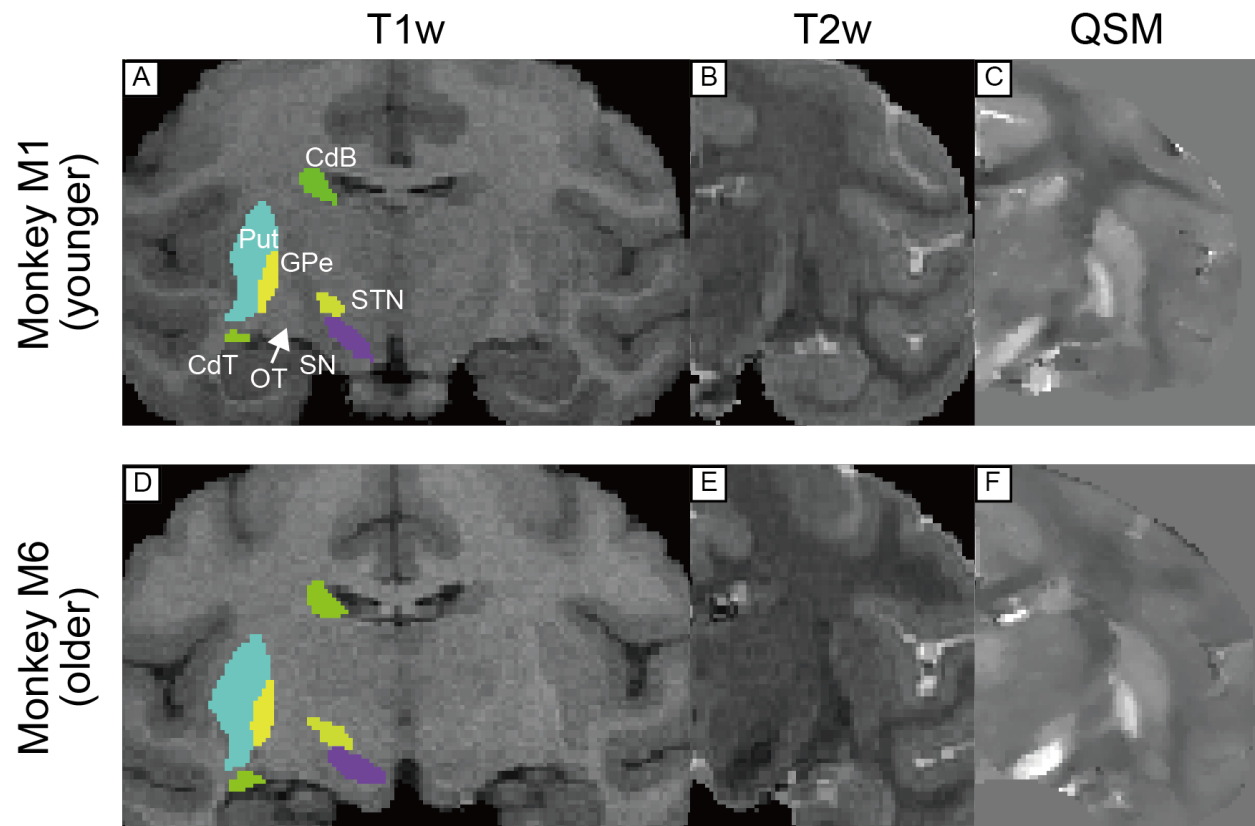

371

372 **Figure 4.** T1w, T2w, and QSM coronal images including substantia nigra in a younger ((A), (B),

373 and (C)) and older monkeys ((D), (E), and (F)). Abbreviations: CdB, body of caudate nucleus.

374 CdT, tail of caudate nucleus. GPe, globus pallidus external segment. OT, optic tract. Put,

375 putamen. SN, substantia nigra. STN, subthalamic nucleus.

376

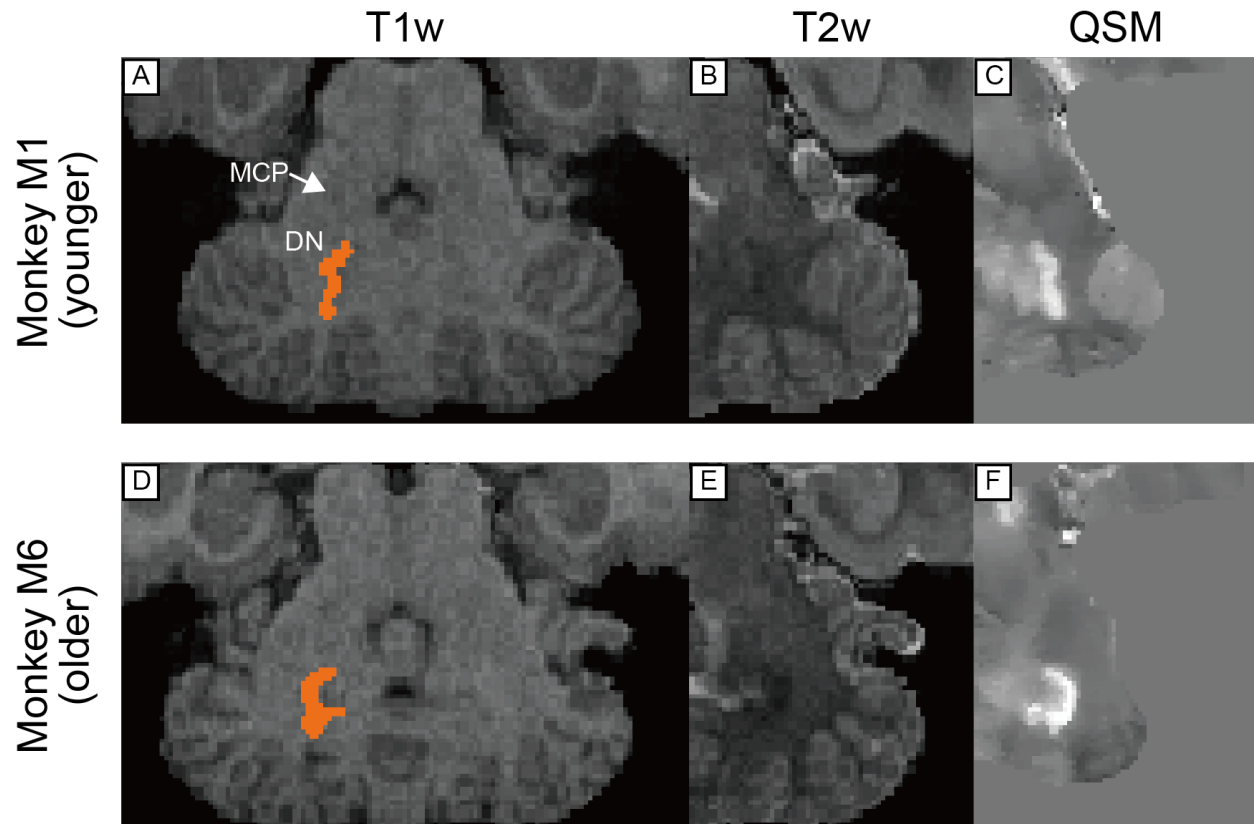

377

378 **Figure 5.** T1w, T2w, and QSM transverse images including dentate nucleus in cerebellum in a  
379 younger ((A), (B), and (C)) and older monkeys ((D), (E), and (F)). Abbreviations: DN, dentate  
380 nucleus. MCP, middle cerebellar peduncle.

381

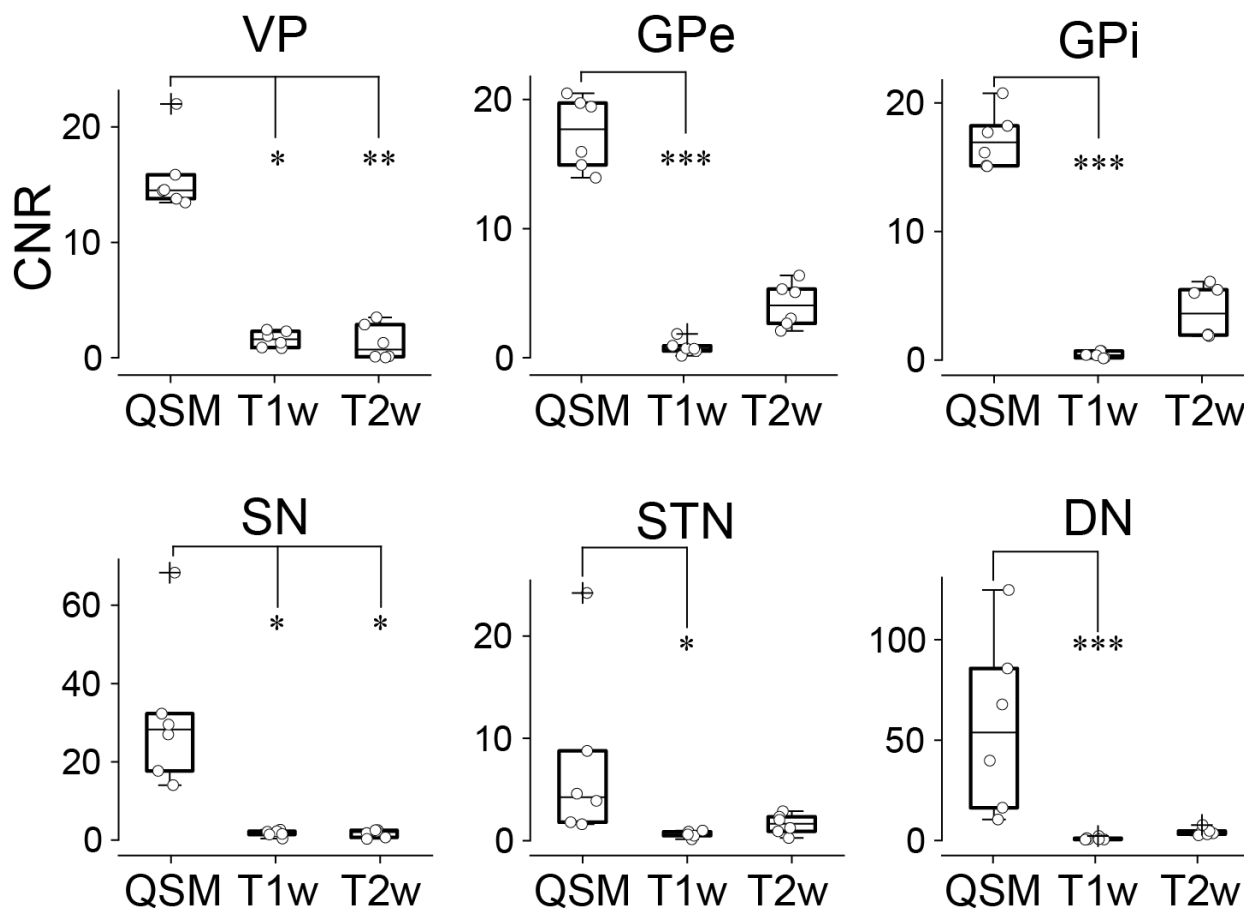

382

383 **Figure 6.** Comparison of CNR among subcortical regions in T1w, T2w, and QSM. In the box  
384 plots, upper and lower lines indicate the 75<sup>th</sup> and 25<sup>th</sup> percentile respectively, and dot line shows  
385 the median. Whiskers above and below the box represent the 10<sup>th</sup> and 90<sup>th</sup> percentiles. The cross  
386 sign indicates the outliers and the circle the CNR value of each data. Differences of CNR among  
387 images were assessed using Kruskal-Wallis test and post hoc test (Dunn-Sidak) (\* $P < 0.05$ , \*\*  $P$   
388  $< 0.01$ , \*\*\* $P < 0.001$ ). Abbreviations: DN, dentate nucleus. GPe, globus pallidus external  
389 segment. GPi, globus pallidus internal segment. SN, substantia nigra. STN, subthalamic nucleus.  
390 VP, ventral pallidum.

391

392

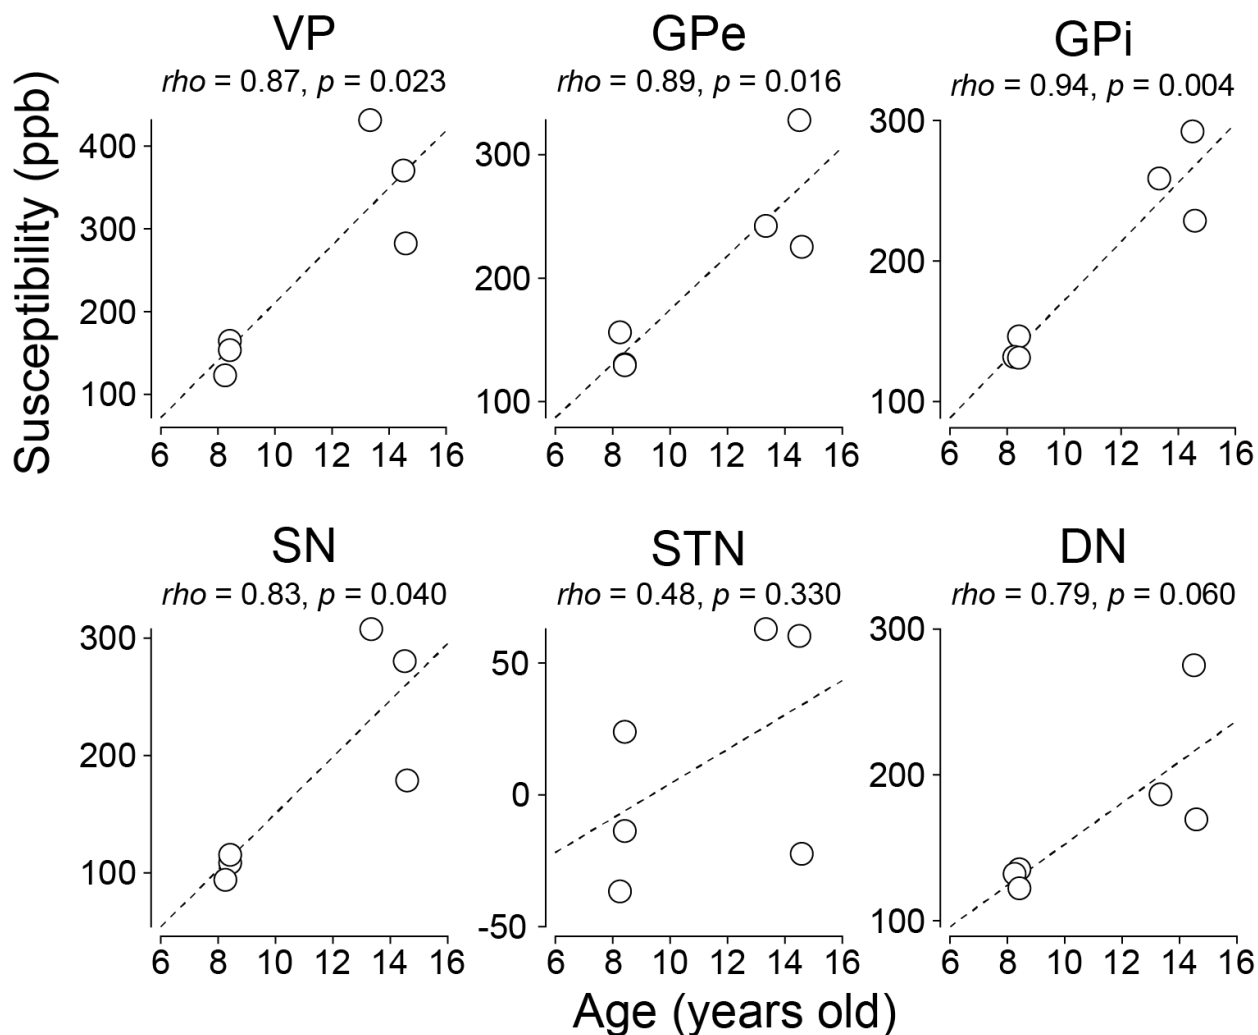

393

394 **Figure 7.** Correlation between monkeys' ages and mean QSM values of subcortical areas. Each

395 circle indicates the mean QSM value of individual subcortical ROIs and the dash line represents

396 regression slope.

397

398

399

400

401

402

403 *Supplementary Figure*

404

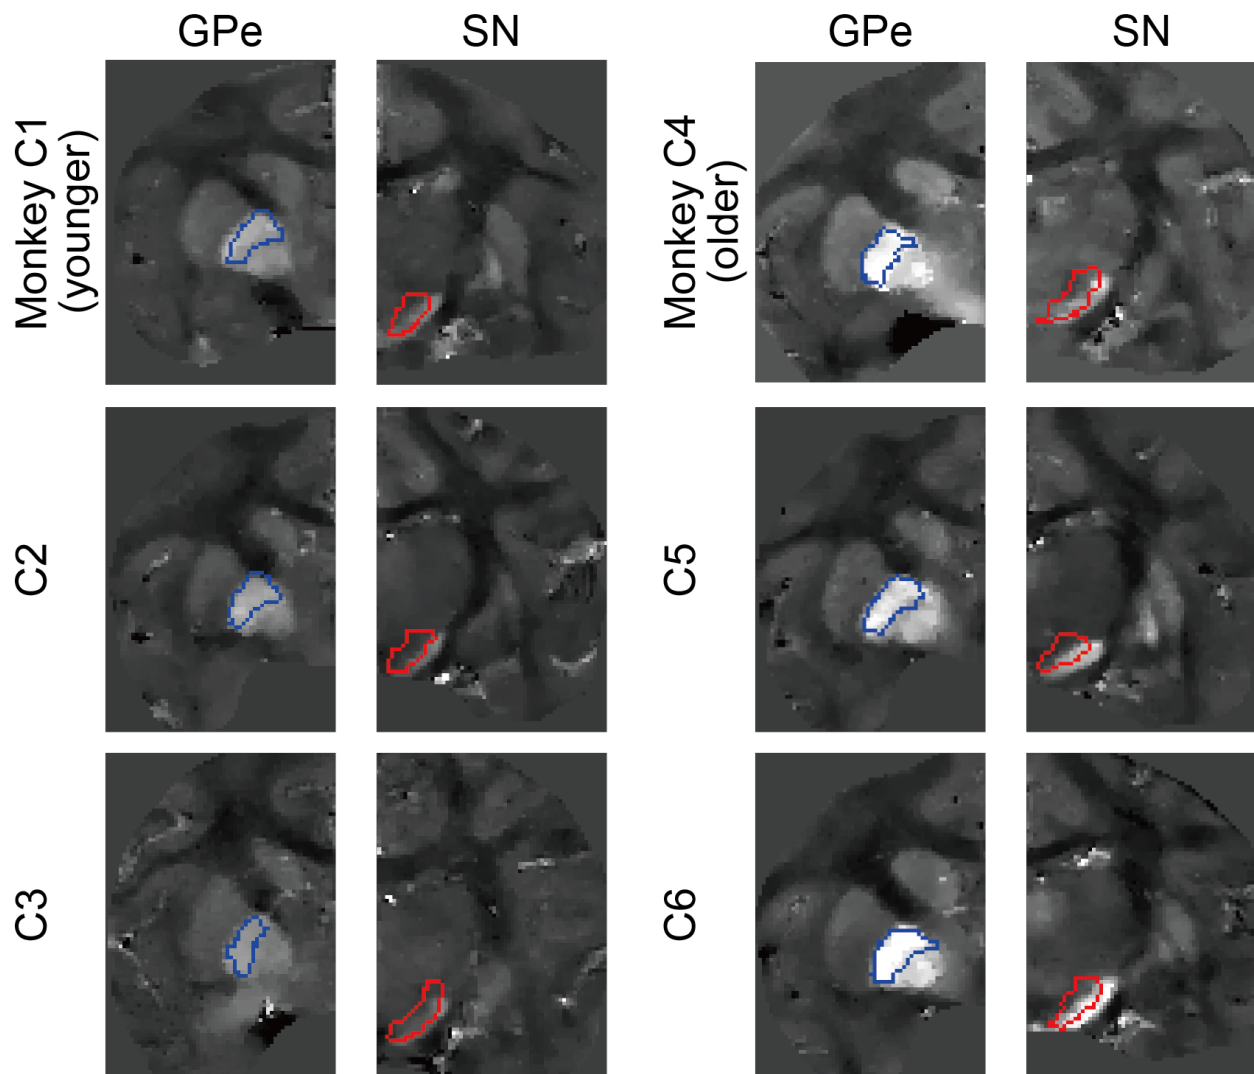

405

406 **Supplementary Figure 1.** Comparison of registered GPe and SN ROIs from the SARM atlas

407 with QSM images of all six monkeys (left hemisphere including the GPe and right hemisphere

408 with the SN). Blue- and red-colored enclosed areas imply the edges of the GPe and SN ROIs

409 created from the SARM atlas registration, respectively.

410

411 **References**

- 412 Amita, H., Kim, H.F., Inoue, K.I., Takada, M., Hikosaka, O., 2020. Optogenetic manipulation of  
413 a value-coding pathway from the primate caudate tail facilitates saccadic gaze shift. *Nat.*  
414 *Commun.* 11, 1876.
- 415
- 416 Ashmore, R.C., Sommer, M.A., 2013. Delay activity of saccade-related neurons in the caudal  
417 dentate nucleus of the macaque cerebellum. *J. Neurophysiol.* 109, 2129-2144.
- 418
- 419 Benjamini, Y., Hochberg, Y. 1995. Controlling the False Discovery Rate: a Practical and  
420 Powerful Approach to Multiple Testing. *J. R. Statist. Soc. B.* 57, 289-300.
- 421
- 422 Bollmann, S., Rasmussen, K.G.B., Kristensen, M., Blendal, R.G., Østergaard, L.R., Plochanski,  
423 M., O'Brien, K., Langkammer, C., Janke, A., Barth, M., 2019. DeepQSM - using deep learning  
424 to solve the dipole inversion for quantitative susceptibility mapping. *Neuroimage.* 195, 373-383.
- 425
- 426 Bonaventura, J., Eldridge, M.A.G., Hu, F., Gomez, J.L., Sanchez-Soto, M., Abramyan, A.M.,  
427 Lam, S., Boehm, M.A., Ruiz, C., Farrell, M.R., Moreno, A., Galal Faress, I.M., Andersen, N.,  
428 Lin, J.Y., Moaddel, R., Morris, P.J., Shi, L., Sibley, D.R., Mahler, S.V., Nabavi, S., Pomper,  
429 M.G., Bonci, A., Horti, A.G., Richmond, B.J., Michaelides, M., 2019. High-potency ligands for  
430 DREADD imaging and activation in rodents and monkeys. *Nat. Commun.* 10, 4627.
- 431
- 432 Bostan, A.C., Strick, P.L., 2018. The basal ganglia and the cerebellum: nodes in an integrated  
433 network. *Nat. Rev. Neurosci.* 19, 338-350.



434

435 Bilgic, B., Pfefferbaum, A., Rohlfing, T., Sullivan, E.V., Adalsteinsson, E., 2012. MRI estimates  
436 of brain iron concentration in normal aging using quantitative susceptibility mapping.

437 *Neuroimage* 59, 2625-2635.

438

439 Cox, R.W., 1996. AFNI: software for analysis and visualization of functional magnetic  
440 resonance neuroimages. *Compt. Biomed. Res.* 29, 162-173.

441

442 Dimov, A.V., Gupta, A., Kopell, B.H., Wang, Y., 2018. High-resolution QSM for functional and  
443 structural depiction of subthalamic nuclei in DBS presurgical mapping. *J. Neurosurg.* 131, 360-

444 367.

445

446 de Hollander, G., Keuken, M.C., Bazin, P.L., Weiss, M., Neumann, J., Reimann, K., Wähnert,  
447 M., Turner, R., Forstmann, B.U., Schäfer, A., 2014. A gradual increase of iron toward the  
448 medial-inferior tip of the subthalamic nucleus. *Hum. Brain Mapp.* 35, 4440-4449.

449

450 El-Shamayleh, Y., Horwitz, G.D., 2019. Primate optogenetics: Progress and prognosis. *Proc.*

451 *Natl. Acad. Sci. U. S. A.* 116, 26195-26203.

452

453 Eldridge, M.A., Lerchner, W., Saunders, R.C., Kaneko, H., Krausz, K.W., Gonzalez, F.J., Ji, B.,  
454 Higuchi, M., Minamimoto, T., Richmond, B.J., 2016. Chemogenetic disconnection of monkey

455 orbitofrontal and rhinal cortex reversibly disrupts reward value. *Nat. Neurosci.* 19, 37-39.

456

457 Fredericks, J.M., Dash, K.E., Jaskot, E.M., Bennett, T.W., Lerchner, W., Dold, G., Ide, D.,  
458 Cummins, A.C., Der Minassian, V.H., Turchi, J.N., Richmond, B.J., Eldridge, M.A.G., 2020.  
459 Methods for mechanical delivery of viral vectors into rhesus monkey brain. *J. Neurosci. Methods*  
460 339, 108730.  
461  
462 Hartig, R., Glen, D., Jung, B., Logothetis, N.K., Paxinos, G., Garza-Villarreal, E.A., Messinger,  
463 A., Evrard, H.C., 2021. The Subcortical Atlas of the Rhesus Macaque (SARM) for  
464 Neuroimaging. *Neuroimage*, 117996.  
465  
466 Ito, M., 2008. Control of mental activities by internal models in the cerebellum. *Nat. Rev.*  
467 *Neurosci.* 9, 304-313.  
468  
469 Jung, B., Taylor, P., Seidlitz, J., Sponheim, C., Perkins, P., Ungerleider, L.G., Glen, D.,  
470 Messinger, A., 2021. A comprehensive macaque fMRI pipeline and hierarchical atlas.  
471 *Neuroimage* 117997.  
472  
473 Kueken, M.C., Bazin, P-L., Backhouse, K., Beekhuizen, S., Himmer, L., Kandola, A., Lafeber,  
474 J.J., Prochazkova, L., Trutti, A., Schafer, A., Turner, R., Forstmann, B.U., 2017. Effects of aging  
475 on T1, T2\*, and QSM MRI values in the subcortex. *Brain Struct. Funct.* 222, 2487-2505.  
476  
477 Kunimatsu, J., Suzuki, T.W., Ohmae, S., Tanaka, M., 2018. Different contributions of  
478 preparatory activity in the basal ganglia and cerebellum for self-timing. *Elife* 7, e35676.  
479

- 480 Li, J., Li, Y., Gutierrez, L., Xu, W., Wu, Y., Liu, C., Li, D., Sun, B., Zhang, C., Wei, H., 2020.  
481 Imaging the Centromedian Thalamic Nucleus Using Quantitative Susceptibility Mapping. *Front.*  
482 *Hum. Neurosci.* 13, 447.  
483
- 484 Li, W., Wu, B., Liu, C., 2011. Quantitative susceptibility mapping of human brain reflects spatial  
485 variation in tissue composition. *Neuroimage* 55, 1645-1656.  
486
- 487 Li, W., Wu, B., Batrachenko, A., Bancroft-Wu, V., Morey, R.A., Shashi, V., Langkammer, C.,  
488 De Bellis, M.D., Ropele, S., Song, A.W., Liu, C. 2014. Differential developmental trajectories of  
489 magnetic susceptibility in human brain gray and white matter over the lifespan. *Hum. Brain*  
490 *Mapp.* 35, 2698-2713.  
491
- 492 Liu, C., Li, W., Tong, K.A., Yeom, K.W., Kuzminski, S., 2015. Susceptibility-weighted imaging  
493 and quantitative susceptibility mapping in the brain. *J. Magn. Reson. Imaging* 42, 23-41.  
494
- 495 Liu, J., Liu, T., de Rochefort, L., Ledoux, J., Khalidov, I., Chen, W., Tsiouris, A.J., Wisnieff, C.,  
496 Spincemaille, P., Prince, M.R., Wang, Y., 2012. Morphology enabled dipole inversion for  
497 quantitative susceptibility mapping using structural consistency between the magnitude image  
498 and the susceptibility map. *Neuroimage* 59, 2560-2568.  
499
- 500 Liu, T., Spincemaille, P., de Rochefort, L., Kressler, B., Wang, Y., 2009. Calculation of  
501 susceptibility through multiple orientation sampling (COSMOS): a method for conditioning the

502 inverse problem from measured magnetic field map to susceptibility source image in MRI.  
503 *Magn. Reson. Med.* 61, 196-204.  
504  
505 Liu, T., Liu, J., de Rochefort, L., Spincemaille, P., Khalidov, I., Ledoux, J.R., Wang, Y., 2011.  
506 Morphology enabled dipole inversion (MEDI) from a single-angle acquisition: comparison with  
507 COSMOS in human brain imaging. *Magn. Reson. Med.* 66, 777-783.  
508  
509 Liu, T., Wisnieff, C., Lou, M., Chen, W., Spincemaille, P., Wang, Y., 2013a. Nonlinear  
510 formulation of the magnetic field to source relationship for robust  
511 quantitative susceptibility mapping. *Magn. Reson. Med.* 69, 467-476.  
512  
513 Liu, T., Eskreis-Winkler, S., Schweitzer, A.D., Chen, W., Kaplitt, M.G., Tsiouris, A.J., Wang,  
514 Y., 2013b. Improved subthalamic nucleus depiction with quantitative susceptibility mapping.  
515 *Radiology* 269, 216-223.  
516  
517 Liu, Z., Spincemaille, P., Yao, Y., Zhang, Y., Wang, Y., 2018. MEDI+0: Morphology enabled  
518 dipole inversion with automatic uniform cerebrospinal fluid zero reference for quantitative  
519 susceptibility mapping. *Magn. Reson. Med.* 79, 2795-2803.  
520  
521 Lu, X., Hikosaka, O., Miyachi, S., 1998. Role of monkey cerebellar nuclei in skill for sequential  
522 movement. *J. Neurophysiol.* 79, 2245-2254.  
523

524 Maeda, K., Inoue, K.I., Kunimatsu, J., Takada, M., Hikosaka, O., 2020. Primate Amygdalo-  
525 Nigral Pathway for Boosting Oculomotor Action in Motivating Situations. *iScience* 23, 101194.  
526  
527 Middleton, F.A, Strick, P.L., 2001. Cerebellar Projections to the Prefrontal Cortex of the  
528 Primate. *J. Neurosci.* 21, 700-712.  
529  
530 Mugler, J.P. 3rd, Bao, S., Mulkern, R.V., Guttman, C.R., Robertson, R.L., Jolesz, F.A.,  
531 Brookeman, J.R., 2000. Optimized single-slab three-dimensional spin-echo MR imaging of the  
532 brain. *Radiology* 216, 891-899.  
533  
534 Nagai, Y., Kikuchi, E., Lerchner, W., Inoue, K.I., Ji, B., Eldridge, M.A., Kaneko, H., Kimura,  
535 Y., Oh-Nishi, A., Hori, Y., Kato, Y., Hirabayashi, T., Fujimoto, A., Kumata, K., Zhang, M.R.,  
536 Aoki, I., Suhara, T., Higuchi, M., Takada, M., Richmond, B.J., Minamimoto, T., 2016. PET  
537 imaging-guided chemogenetic silencing reveals a critical role of primate rostromedial caudate in  
538 reward evaluation. *Nat. Commun.* 7, 13605.  
539  
540 Ohmae, S., Uematsu, A., Tanaka, M., 2013. Temporally specific sensory signals for the detection  
541 of stimulus omission in the primate deep cerebellar nuclei. *J. Neurosci.* 33, 15432-15441.  
542  
543 Persson, N., Wu, J., Zhang, Q., Liu, T., Shen, J., Bao, R., Ni, M., Liu, T., Wang, Y.,  
544 Spincemaille, P., 2015. Age and sex related differences in subcortical brain iron concentrations  
545 among healthy adults. *Neuroimage* 122, 385-398.  
546

547 Schafer, A., Forstmann, B.U., Neumann, J., Wharton, S., Mietke, A., Bowtell, R., Turner, R.  
548 2012. Direct visualization of the subthalamic nucleus and its iron distribution using high-  
549 resolution susceptibility mapping. *Hum. Brain Mapp.* 33, 2831-2842.  
550  
551 Schweser, F., Deistung, A., Lehr, B.W., Reichenbach, J.R., 2011. Quantitative imaging of  
552 intrinsic magnetic tissue properties using MRI signal phase: an approach to in vivo brain iron  
553 metabolism? *Neuroimage* 54, 2789-2807.  
554  
555 Seidlitz, J., Sponheim, C., Glen, D., Ye, F.Q., Saleem, K.S., Leopold, D.A., Ungerleider, L.,  
556 Messinger, A., 2018. A population MRI brain template and analysis tools for the macaque.  
557 *Neuroimage* 170, 121-131.  
558  
559 Strick, P.L., Dum, R.P., Fiez, J.A., 2009. Cerebellum and nonmotor function. *Annu. Rev.*  
560 *Neurosci.* 32, 413-434.  
561  
562 Tang, J., Liu, S., Neelavalli, J., Cheng, Y.C., Buch, S., Haacke, E.M., 2013.  
563 Improving susceptibility mapping using a threshold-based K-space/image domain iterative  
564 reconstruction approach. *Magn. Reson. Med.* 69, 1396-1407.  
565  
566 Wang, Y., Liu, T., 2015. Quantitative susceptibility mapping (QSM): Decoding MRI data for a  
567 tissue magnetic biomarker. *Magn. Reson. Med.* 73, 82-101.  
568

- 569 Wei, H., Zhang, C., Wang, T., He, N., Li, D., Zhang, Y., Liu, C., Yan, F., Sun, B., 2019. Precise  
570 targeting of the globus pallidus internus with quantitative susceptibility mapping for deep brain  
571 stimulation surgery. *J. Neurosurg.* 191254.  
572
- 573 Wen, Q., Yang, H., Zhong, K., 2019. Quantitative susceptibility mapping of ultra-high resolution  
574 monkey brain in vivo at 9.4 T. *Sheng Wu Yi Xue Gong Cheng Xue Za Zhi.* 36, 349-355.  
575
- 576 Wharton, S., Schäfer, A., Bowtell, R., 2010. Susceptibility mapping in the human brain using  
577 threshold-based k-space division. *Magn. Reson. Med.* 63, 1292-1304.  
578
- 579 Wu, B., Li, W., Guidon, A., Liu, C., 2012. Whole brain susceptibility mapping using compressed  
580 sensing.  
581 *Magn. Reson. Med.* 67, 137-147.  
582
